# Supplementary material for: Macrophage-mediated epimorphosis in pig heart with right ventricular failure
Source: bioRxiv or medRxiv preprint supplement (doi:10.1101/2022.07.04.498652), 2025-12-29
Supplement: Supplementary file [file media-1.pdf]

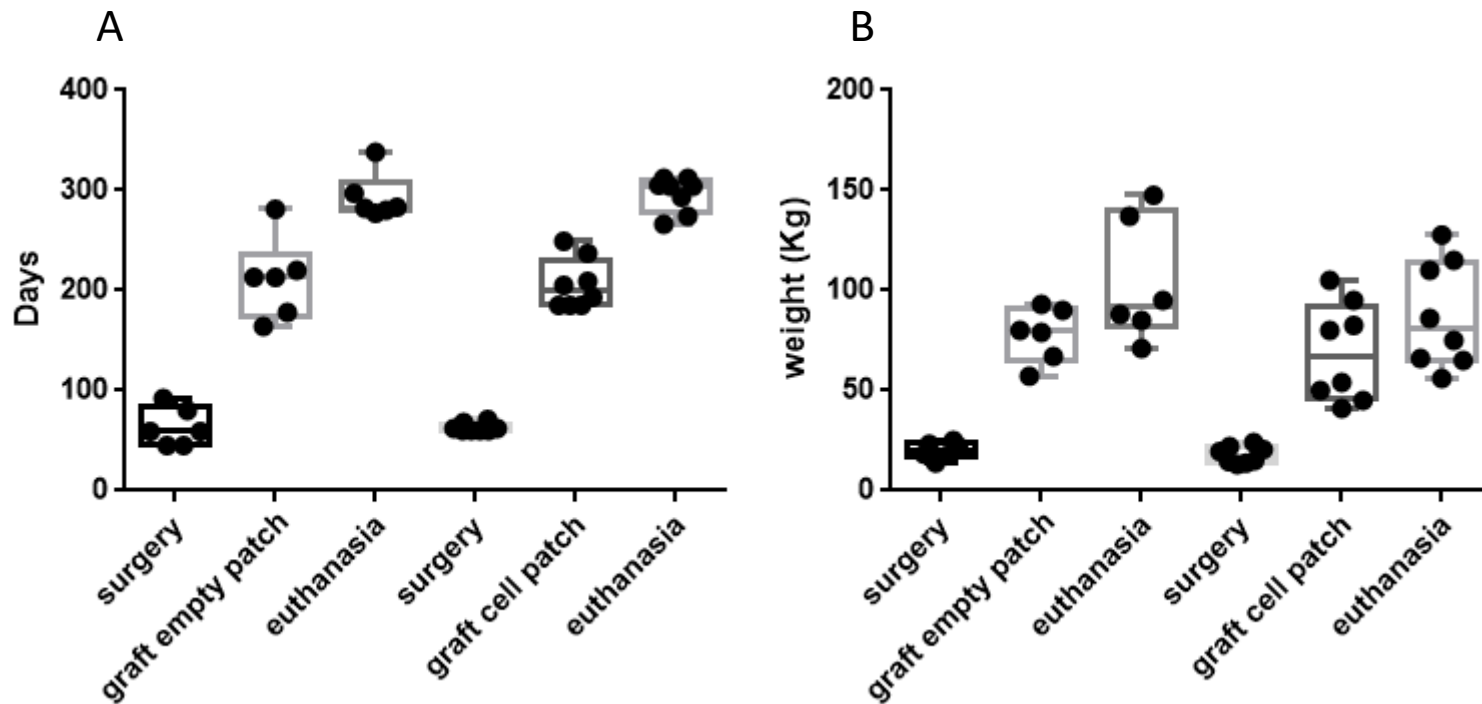

Figure S1: Pig age (A) and weight (B) in the course of experiment

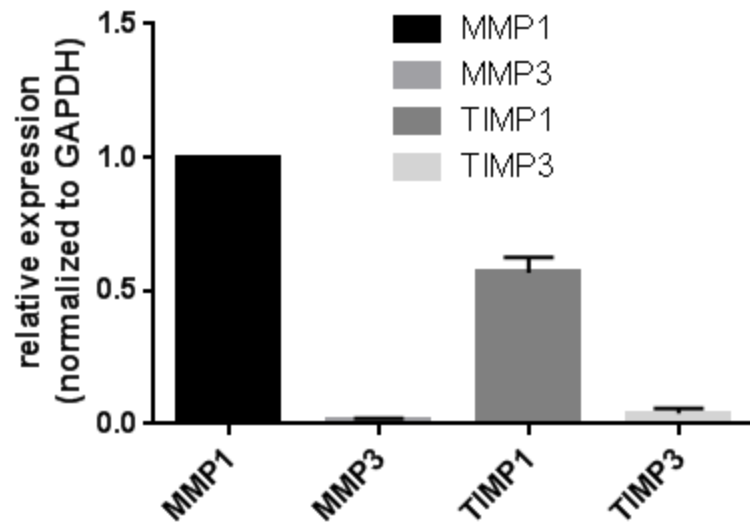

**Figure S2: QPCR of MMP genes from RNA extracted from human ES cells derived cardiac progenitor cells**

**A**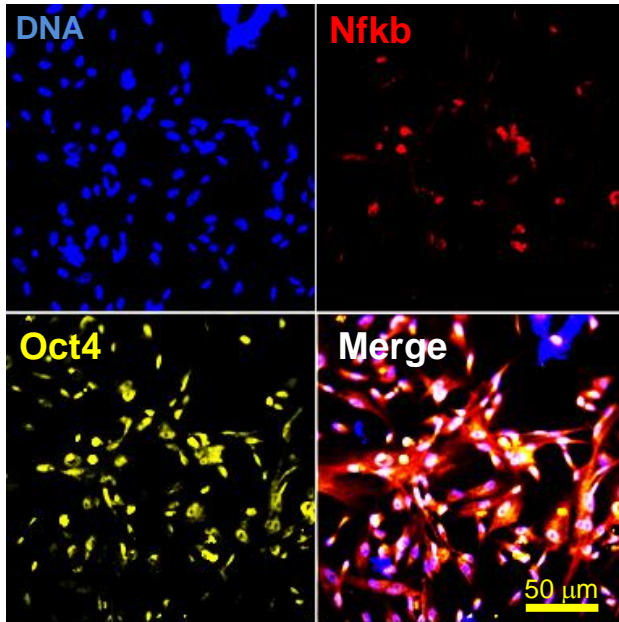

**Figure S3: Nfkb triggers reprogramming of cardiac fibroblasts and cardiomyocytes.** Nfkb (*relAp65*) was transfected in human cardiac fibroblasts (**A**) and mouse postmitotic cardiomyocytes (**B**). Cells were left in culture for two weeks and stained for Oct4 and actinin. The experiments were performed in triplicate

**B**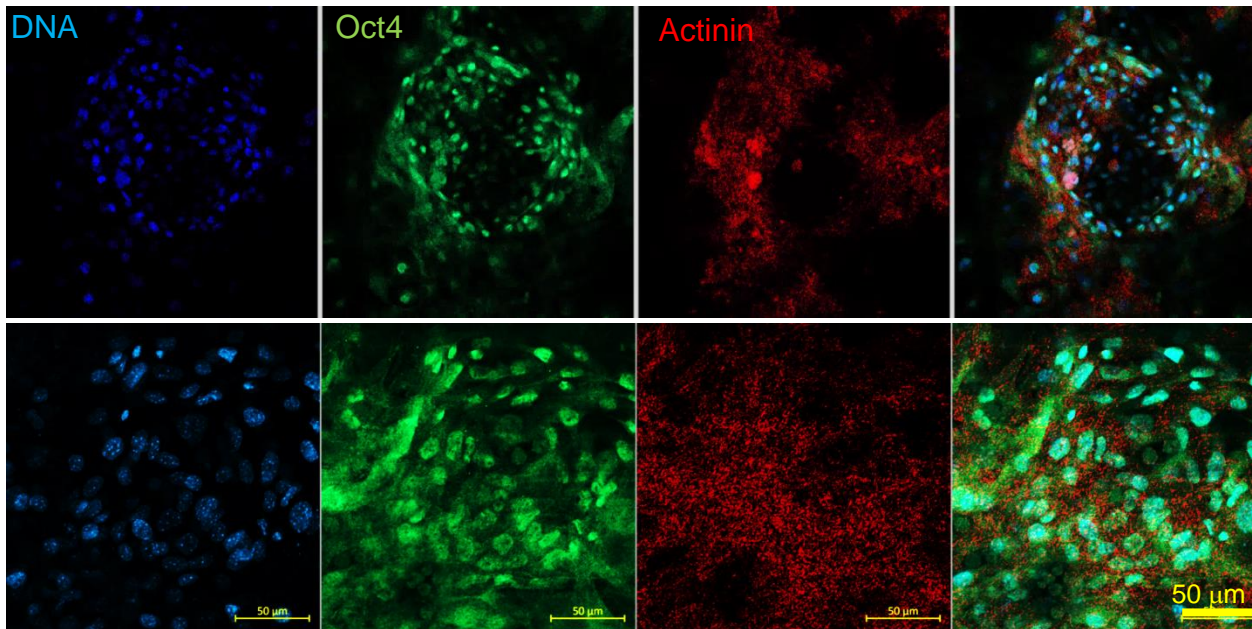

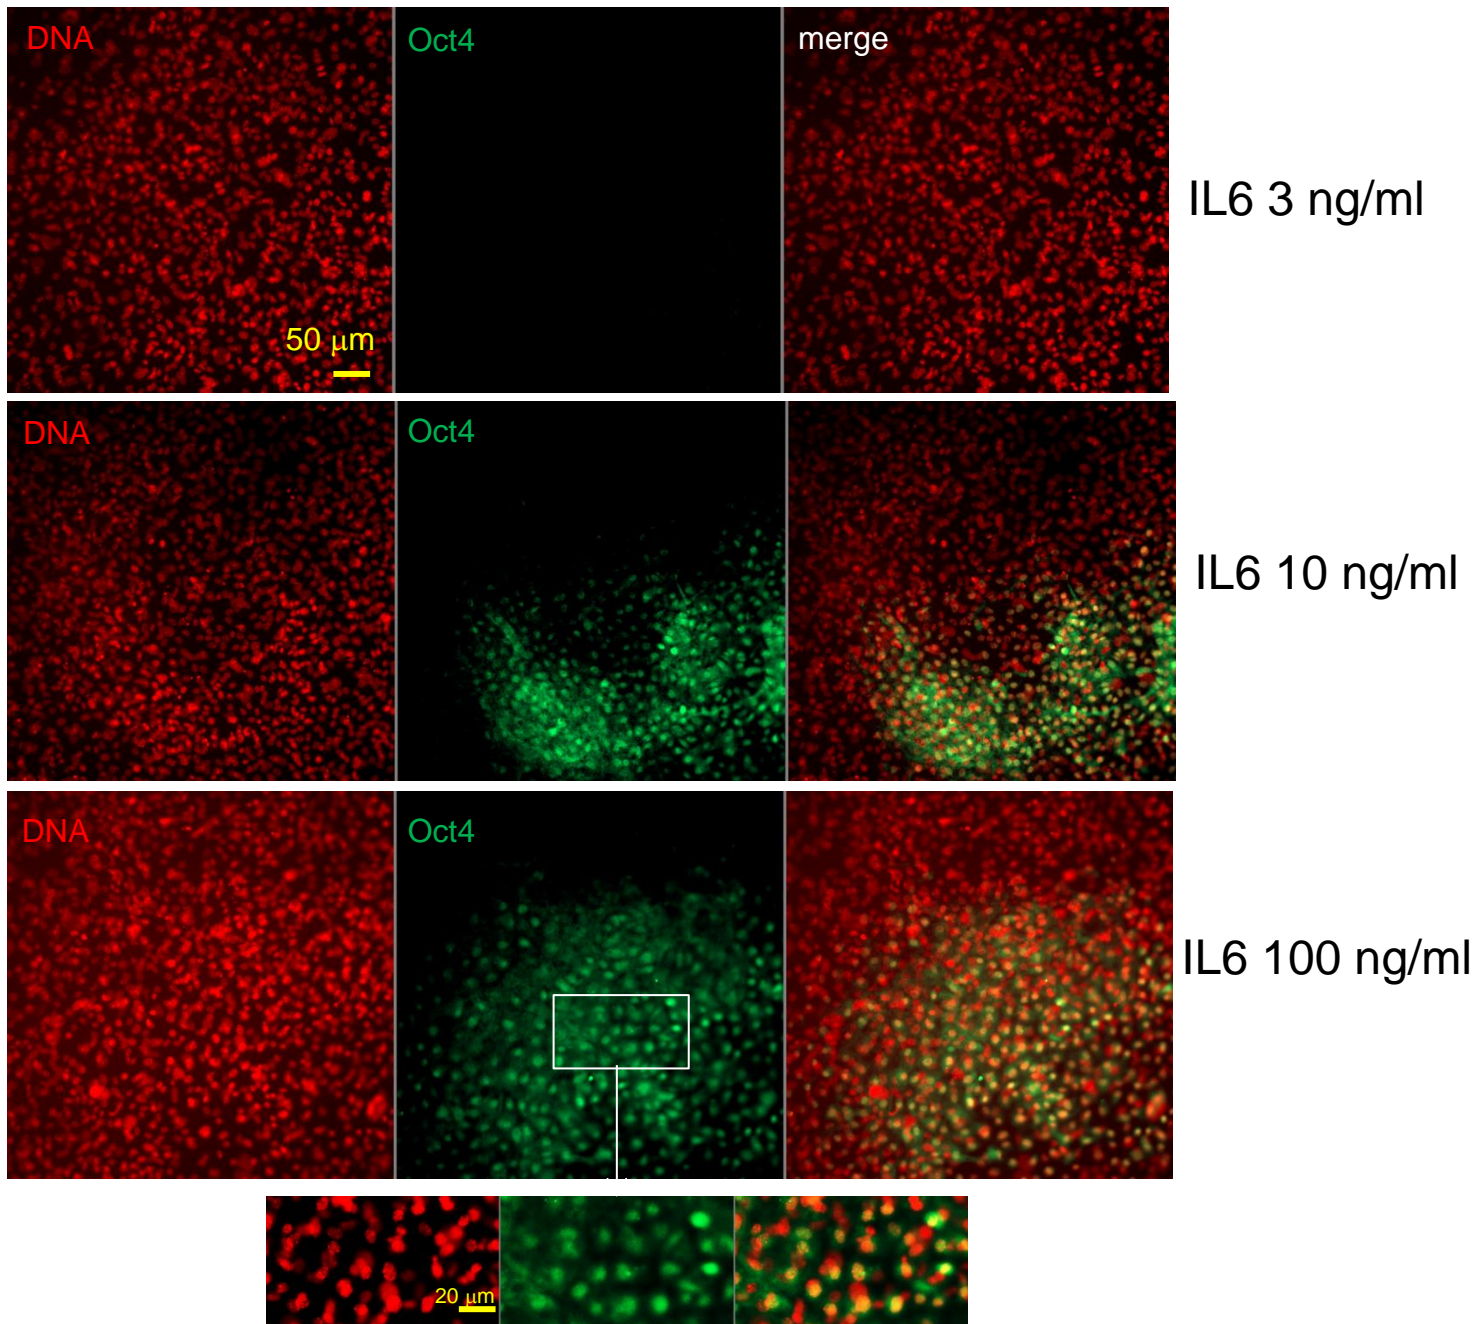

**Figure S4: IL6 reprograms 7 days old post-mitotic mouse cardiomyocytes in a dose dependent manner.** Cardiomyocytes in culture were treated for 7 days with 3, 10 or 100 ng/ml IL6, then stained with anti-Oct4 antibody and dapi (red)
